## Locomotor trade-offs in mice selectively bred for high voluntary wheel running

Elizabeth M. Dlugosz<sup>1</sup>, Mark A. Chappell<sup>1</sup>, David G. McGillivray<sup>2</sup>, Douglas A. Syme<sup>2</sup>  
 and Theodore Garland, Jr<sup>1,\*</sup>

<sup>1</sup>Department of Biology, University of California, Riverside, CA 92521, USA and <sup>2</sup>Department of Biological Sciences, University of Calgary, Calgary, Alberta, Canada T2N 1N4

\*Author for correspondence (e-mail: tgarland@ucr.edu)

Accepted 28 May 2009

### SUMMARY

We investigated sprint performance and running economy of a unique ‘mini-muscle’ phenotype that evolved in response to selection for high voluntary wheel running in laboratory mice (*Mus domesticus*). Mice from four replicate selected (S) lines run nearly three times as far per day as four control lines. The mini-muscle phenotype, resulting from an initially rare autosomal recessive allele, has been favoured by the selection protocol, becoming fixed in one of the two S lines in which it occurred. In homozygotes, hindlimb muscle mass is halved, mass-specific muscle oxidative capacity is doubled, and the medial gastrocnemius exhibits about half the mass-specific isotonic power, less than half the mass-specific cyclic work and power, but doubled fatigue resistance. We hypothesized that mini-muscle mice would have a lower whole-animal energy cost of transport (COT), resulting from lower costs of cycling their lighter limbs, and reduced sprint speed, from reduced maximal force production. We measured sprint speed on a racetrack and slopes (incremental COT, or iCOT) and intercepts of the metabolic rate *versus* speed relationship during voluntary wheel running in 10 mini-muscle and 20 normal S-line females. Mini-muscle mice ran faster and farther on wheels, but for less time per day. Mini-muscle mice had significantly lower sprint speeds, indicating a functional trade-off. However, contrary to predictions, mini-muscle mice had higher COT, mainly because of higher zero-speed intercepts and postural costs (intercept–resting metabolic rate). Thus, mice with altered limb morphology after intense selection for running long distances do not necessarily run more economically.

Key words: artificial selection, exercise, experimental evolution, maximum metabolic rate, oxygen consumption, sprint speed, trade-off.

### INTRODUCTION

For most animals, the ability to move through the environment is fundamental to many fitness-critical functions, including defending territories, finding mates and food, migration and escaping from predators. Mechanistically, locomotion is a complex, highly integrative, whole-animal trait that incorporates numerous organ systems [e.g. circulatory, muscular, nervous, sensory, respiratory, skeletal (Swallow et al., 2009)]. From an ecological and evolutionary perspective, two very important elements of locomotion are energy costs and performance abilities (e.g. speed, stamina, agility). Locomotion may be energetically expensive, and whether a large or small portion of the daily energy budget is spent on activity, the expense of locomotion can affect behaviour (particularly in animals that travel extensively). Aside from energy costs, the limits to locomotor performance constrain an animal’s ability to perform many behaviours. Accordingly, it is reasonable to assume that, in many circumstances, selection may favour an increase in both locomotor economy and certain aspects of performance.

A common measure used to assess the energetic costs of locomotion is the ‘cost of transport’ (COT), which is defined as the energy required to move a unit distance. When comparing animals that vary in body size, COT is commonly expressed on a mass-specific basis, thus indicating the energy required to move a unit mass a unit distance, and larger animals generally have lower mass-specific COT (e.g. Taylor et al., 1970; Taylor et al., 1982; John-Alder et al., 1986). In most terrestrial runners, transport costs include two components. One is the energy cost associated with movement *per se*, usually defined as the regression of metabolic power (e.g. oxygen consumption) on running speed. This is called the

incremental cost of transport (iCOT). For many runners, the speed *versus* power relationship is linear, so the iCOT is independent of speed (Taylor et al., 1970; Taylor et al., 1982; John-Alder et al., 1986). In addition to iCOT, the second cost associated with locomotion is the ‘postural cost’, manifested as an elevation of the zero-speed intercept of the speed *versus* power relationship above resting metabolic rate (Taylor et al., 1970; Taylor et al., 1982; John-Alder et al., 1986). Selection to reduce COT could affect iCOT, postural costs, or both. All else being equal, a reduced COT will decrease the energy requirements of locomotion at a given speed, and, therefore, increase the maximal aerobic speed (the highest speed that can be powered by aerobic pathways) and hence endurance.

A long-term selection experiment (Swallow et al., 1998; Swallow et al., 2009) that includes four replicate lines of mice bred for high levels of voluntary wheel running and four non-selected control lines provides a good system to examine whether costs associated with running may change as a result of intense selection on running behaviour. On a daily basis, mice from the selected (S) lines run 2.5- to 3.0-fold farther than control mice, and the increased distance is mainly accomplished by higher running speeds (Koteja et al., 1999; Rhodes et al., 2000; Girard et al., 2001; Rezende et al., 2005; Rezende et al., 2009). As a group, the four replicate selected lines show a diverse suite of morphological, biochemical, physiological, and behavioural differences from the four non-selected control lines (e.g. Swallow et al., 1999; Girard et al., 2001; Garland and Freeman, 2005; Kelly et al., 2006; Bilodeau et al., 2009; Rezende et al., 2009; Swallow et al., 2009).

One dramatic response to the selection regimen has been an increase in frequency of the ‘mini-muscle’ phenotype, characterized

by a 50% reduction in hindlimb muscle mass and inherited as a Mendelian recessive (Garland et al., 2002; Houle-Leroy et al., 2003; Hannon et al., 2008; Hartmann et al., 2008; Middleton et al., 2008). Within the S lines, one has become fixed for the mini-muscle phenotype, a second remains polymorphic, and the other two lines apparently lost the mini phenotype by random genetic drift during early generations of the experiment. Fitting with population genetic models indicates that mini-muscles have been favoured by the selection protocol (Garland et al., 2002), but the reason for this is as yet unclear.

Although mini-muscle individuals tend to run faster on wheels than those with normal muscles, they do not consistently run further on a daily basis (Garland et al., 2002; Kelly et al., 2006), but (see Syme et al., 2005; Hannon et al., 2008; Gomes et al., 2009). Nevertheless, the mini-muscle trait might provide an advantage in terms of endurance capacity during voluntary running. The reduction in limb mass in these mice is reminiscent of the thin, lightweight limb morphology seen in 'classical' cursorial mammals, such as deer and antelope [references in Garland and Freeman (Garland and Freeman, 2005)] (Kelly et al., 2006). Although much of the cost of cursorial locomotion seems to involve supporting body mass (e.g. Fedak et al., 1982; Heglund et al., 1982), the kinetic energy of limb motion can be a substantial fraction of total energy expenditures during running (e.g. Martin, 1985; Claremont and Hall, 1988). Accordingly, we hypothesized that the lighter limbs of mini-muscle individuals should reduce the energy cost of limb cycling during locomotion, and hence improve running economy. Moreover, studies of isolated medial gastrocnemius demonstrate increased fatigue resistance of mini-muscles (Syme et al., 2005), which may be related to altered enzyme activities, including twice the mass-specific aerobic capacity of normal mice in mixed hindlimb muscle (Houle-Leroy et al., 2003; Guderley et al., 2006), a shift toward slower myosin heavy chain isoforms (Guderley et al., 2006; Guderley et al., 2008; McGillivray et al., 2009), and increased capillarity (Wong et al., 2009). Beyond this, mini-muscle individuals have significantly longer and thinner femora and tibiafibulae (with no difference in bone masses), larger heart ventricles, and increased maximal oxygen consumption when measured in hypoxia (Garland et al., 2002; Swallow et al., 2005; Kelly et al., 2006; Rezende et al., 2006a).

In the present study, we measured energy costs of voluntary running and the maximal forced sprinting performance in S mice from three lines, one fixed for mini-muscles and two that do not exhibit the trait. We hypothesized that *iCOT* would be lower in mini-muscle mice than in normal mice because a smaller muscle (a reduction in hindlimb mass) would reduce the cost of cycling the leg. Reducing the energy required for contraction cycles may further contribute to increased resistance to fatigue (Syme et al., 2005), substantial energy savings, and enhanced sustained running ability in mini-muscle mice.

We also hypothesized that maximal sprint speeds would be lower in mini-muscle mice than in normal mice because the former have a smaller and slower medial gastrocnemius as well as thigh muscle reduced in mass by ~50%, which should result in reduced maximal power output and force production during sprinting. Compared with normal mice, mass-specific maximum power output of the medial gastrocnemius in mini mice is reduced by about half during isotonic shortening and by about 50–80% during cyclic contractions (Syme et al., 2005). Furthermore, considering the reduced mass of the gastrocnemius in mini-muscle mice, the absolute power from this muscle that is available for running is reduced to 10–20% of that in normal mice (Syme et al., 2005). We anticipated that this reduction in power would be more detrimental to sprinting ability than

potential enhancements from possessing longer hindlimbs (Kelly et al., 2006).

## MATERIALS AND METHODS

### Animals and experimental protocol

We studied mice (*Mus domesticus* Schwarz and Schwarz 1943) from generation 46 of an ongoing artificial selection experiment for high voluntary wheel running, which includes four selected (S) lines (lab designations 3, 6, 7 and 8) and four control (C) lines (lab designations 1, 2, 4 and 5). The S lines include the highest-running males and females from each family as the breeders for the next generation (determined from highest number of revolutions run on days 5 and 6 of a 6-day period of wheel access). In the C lines, breeders are chosen at random from within each family (Swallow et al., 1998).

In each generation, mice are housed four per cage from weaning (21 days of age) until the period of selection (6–8 weeks of age), at which time they are housed with wheel (circumference=1.12 m) access for 6 days. *Ad libitum* food and water were provided. Animals were held on a 12 h:12 h L:D photoperiod (light from 07:00–19:00 h). Daily wheel activity was recorded with a computer. The thirty females used in this experiment were sampled from S lines 3, 7 and 8. All line 3 mice show the mini-muscle phenotype, but it is absent from lines 7 and 8.

Following the routine 6-day wheel test as part of the regular selection protocol, mice were housed four per cage and later allowed access to running wheels (the same wheels used for the selection protocol) for 5 days before being measured in respirometry wheels enclosed in metabolic chambers [design shown in fig. 1 in Chappell et al. (Chappell et al., 2004)]. Age at the start of these respirometry trials averaged 137 days (range 123–147). Briefly, the wheel chamber consisted of a Plexiglas<sup>®</sup> enclosure containing a running wheel (1.12 m circumference) attached to a standard housing cage supplied with bedding, a food hopper containing rodent chow, and a drinking tube. Each wheel enclosure was equipped with an internal fan to circulate air and a small generator that served as a tachometer and transduced wheel speed and direction into electrical signals. Mice were placed in wheel chambers at about 11:30 h (i.e. the middle of the normally resting phase of the daily activity cycle). Oxygen and carbon dioxide concentration, flow rate, temperature and wheel speed were measured over a 23.5 h period and recorded on a Macintosh computer equipped with LabHelper software (Warthog, <http://www.warthog.ucr.edu>). Air flow was maintained at 2,500 ml min<sup>-1</sup> with Porter Instruments mass flow controllers (Hatfield, PA, USA) and 2.5 min gas reference readings were obtained every 45 min to control for any baseline drift in the gas analysers. Excurent air was subsampled at about 100 ml min<sup>-1</sup>, dried with magnesium perchlorate, and directed to an oxygen analyzer (Oxilla, Sable Systems, Henderson, NV, USA) and carbon dioxide analyzer (CA-2A, Sable Systems).

After the wheel test, mice were chased along a photocell-lined racetrack to determine apparent maximal sprint speed, following standard procedures for small rodents (Djawdan and Garland, 1988; Garland et al., 1988; Friedman et al., 1992; Dohm et al., 1994; Garland et al., 1995; Dohm et al., 1996). Wheel measurements and sprint speed were, on average, 11.3 days apart. The track was 6 m in length with 12 photocells spaced at 0.5 m intervals, and a width of 7.5 cm. The substratum was a textured rubber conveyor belt material that provided excellent traction. Sprint speed was computed from time elapsed between successive photocell stations, and the fastest 1-m interval (three adjacent photocells) was recorded for each run. A subjective behavioural score (five categories from 'poor' to 'excellent') of running effort was also recorded for each mouse. This was used to

assess each mouse's motivation to run. Five trials were done on each of two consecutive days to assess repeatability. The single fastest 1-m interval for each individual was used as its maximum speed.

#### Calculation of O<sub>2</sub> and CO<sub>2</sub>

We assumed a constant respiratory quotient (RQ) of 0.85 [based on measurements from Chappell et al. (Chappell et al., 2004)] and calculated oxygen consumption ( $\dot{V}_{O_2}$ ) as:

$$\dot{V}_{O_2} = \dot{V} (F_{iO_2} - F_{eO_2}) / [1 - F_{eO_2} (1 - RQ)], \quad (1)$$

where  $\dot{V}$  is the flow rate,  $F_{iO_2}$  and  $F_{eO_2}$  are fractional incurrent and excurrent oxygen concentrations, respectively. In order to avoid either frequent CO<sub>2</sub> scrubber changes or long lag times because of the large scrubber volumes, CO<sub>2</sub> was not removed before oxygen measurements. Carbon dioxide production ( $\dot{V}_{CO_2}$ ) was used to validate the RQ assumptions; it was computed as:

$$\dot{V}_{CO_2} = \dot{V} (F_{eCO_2} - F_{iCO_2}) / \{1 - F_{eCO_2} [1 - (1/RQ)]\}, \quad (2)$$

where  $F_{iCO_2}$  and  $F_{eCO_2}$  are fractional incurrent and excurrent CO<sub>2</sub> concentrations, respectively.

'LabAnalyst' software was used to smooth metabolic data *via* a nearest-neighbour algorithm and the 'instantaneous' transformation was used to resolve short-term events (Bartholomew et al., 1981). LabAnalyst was also used to subtract baselines, interpolate through references, correct lag times, and compute O<sub>2</sub> and CO<sub>2</sub> (e.g. Fig. 1).

We calculated slopes (iCOT) and intercepts of the speed *versus* O<sub>2</sub> relationship using least-squares linear regression of speed and O<sub>2</sub> for each individual (e.g. Fig. 2). Data were obtained with the LabAnalyst stepped sampling procedure (1-min means separated by 3 min; the initial 1-min block was the midpoint of the entire 23.5 h of recording) to eliminate autocorrelation, as sequential samples are not independent (Chappell et al., 2004; Rezende et al., 2006b). Speeds less than 0.5 m min<sup>-1</sup> were discarded to eliminate any effects of electrical noise in the tachometer. Outliers were removed by visual inspection. Resting metabolic rate was measured as described below. The *Y*-intercept was used to calculate the postural cost (intercept - resting metabolic rate), which is generally thought to be the cost associated with holding a body in an upright position (Taylor et al., 1970; Schmidt-Nielsen, 1972; Bennett, 1985). Traits calculated for the wheel metabolic trials were as follows:

Distance run = total distance run over 23.5 h recording period (m).

Run time = total time spent running (wheel rotating) over 23.5 h recording period (min).

Maximum wheel speed ( $V_{max}$ ) = highest speed in a 1.5 s sample interval (m min<sup>-1</sup>).

Maximum 1-min wheel speed ( $V_{max1}$ ) = maximum voluntary speed averaged over 1 min (m min<sup>-1</sup>).

Maximum voluntary O<sub>2</sub> (O<sub>21</sub>) = Maximum voluntary O<sub>2</sub> averaged over 1 min (ml min<sup>-1</sup>).

Daily energy expenditure (DEE) = O<sub>2</sub> averaged over 23.5 h recording period (ml min<sup>-1</sup>).

Resting metabolic rate (RMR<sub>10</sub>) = Minimum O<sub>2</sub> averaged over 10 min (ml min<sup>-1</sup>).

Incremental cost of transport (iCOT) = Slope of speed *versus* O<sub>2</sub> regression (ml O<sub>2</sub> m<sup>-1</sup>), using 1-min means separated by 3 min.

Intercept = Intercept of speed *versus* O<sub>2</sub> regression (ml O<sub>2</sub> min<sup>-1</sup>).

Postural cost = Intercept - RMR<sub>10</sub> (ml O<sub>2</sub> min<sup>-1</sup>).

Absolute cost of transport = [(iCOT × distance) + (postural cost × run time)] (ml O<sub>2</sub>).

Ecological cost of transport (% DEE) = [100 × (distance × slope) / DEE] (Garland, 1983).

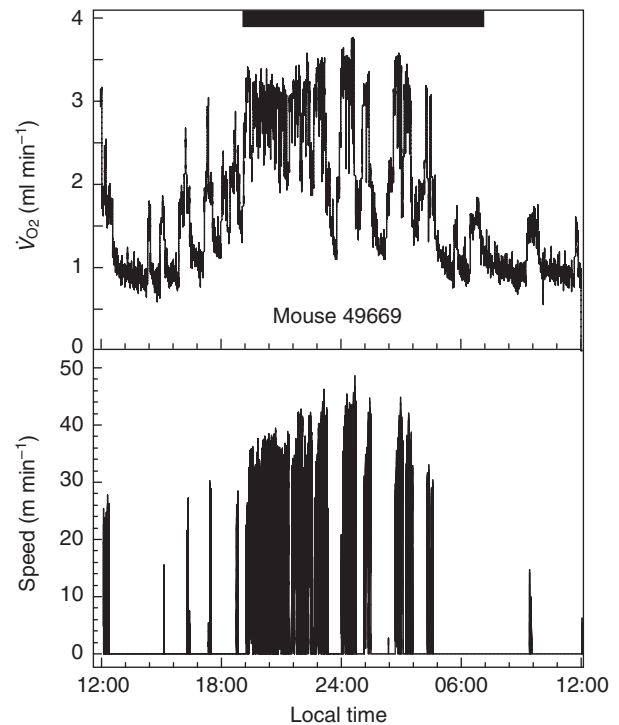

Fig. 1. Example of voluntary wheel running recorded over 23.5 h, showing speed and oxygen consumption. Shaded bar indicates lights out.

#### Statistics

We compared mini-muscle mice (line 3) with normal mice (lines 7 and 8) using analysis of variance (ANOVA, for wheel-running traits) or covariance (ANCOVA, for metabolic traits and sprint speed) with body mass as a covariate, and a planned contrast (SAS PROC MIXED, version 9.1). Repeatability of sprint speed between days 1 and 2 was assessed using a paired *t*-test and a Pearson product-moment correlation. Significance was judged at  $\alpha=0.05$ , and we report two-tailed significance levels unless we had specific directional predictions.

## RESULTS

### Routine wheel testing

Results from days 5 and 6 of the 6-day wheel exposure used to identify breeders in the selection experiment (Table 1) indicate that mini-muscle mice did not differ from normal selected-line mice in distance run or in maximum speed attained in any 1-min interval. However, on average, mini-muscle mice spent less time running (two-tailed,  $P=0.0017$ ) and ran at higher mean speeds ( $P=0.0018$ ) than normal mice (Fig. 3).

### Costs of voluntary locomotion

Two mice were tested twice for voluntary running costs because of poor performance or equipment problems during the initial measurement. During the metabolic trials, neither distance run nor time spent running (Table 2) was significantly different between mini-muscle and normal mice. However,  $V_{max}$  and  $V_{max1}$  were significantly higher in mini-muscle mice ( $P=0.0009$  and  $P=0.0010$ , respectively). No body mass effects were found, and therefore, body mass was not used as a covariate in analyses of running behaviour (Table 3 reports the mean of masses from before and after respirometry measurements, and on both days of sprint speed tests).

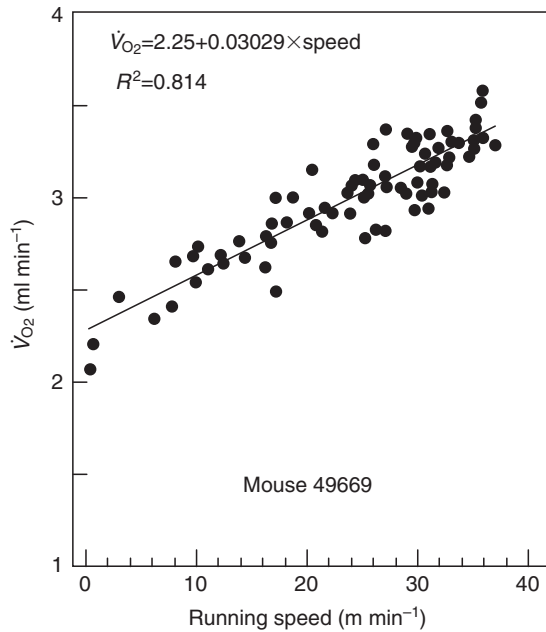

Fig. 2. Example of typical relationship between running speed and oxygen consumption during 23.5 h of voluntary wheel running. Cost of transport (slope), intercept, resting metabolic rate, and postural cost were obtained for 30 female mice. ANCOVA results accounting for body mass are listed in Table 3.

As might be expected from the elevated maximum voluntary running speeds of mini-mice, the highest voluntary oxygen consumption during any 1-min interval ( $\dot{V}_{O_2 1}$ ) was also significantly higher in mini-muscle *versus* normal mice ( $P=0.0122$ ; Table 3). DEE was significantly higher in mini-muscle mice than in normal mice ( $P=0.0442$ ), but  $RMR_{10}$  did not differ (Table 3). We found no statistical differences in RER between mini-muscle and normal mice, either during the highest single minute of oxygen consumption or during the 10-min RMR measurement (Table 3; results were similar when body mass was not included in the model).

Only 29 mice were included in the  $RMR_{10}$  and postural cost analyses because one mouse was very active even when not running and did not provide a valid RMR. Contrary to predictions, the slope of the speed *versus*  $O_2$  regression, or iCOT, was not significantly different between mini-muscle and normal selected lines (Table 3). Also unexpected, was the significant difference in intercept between mini-muscle and normal mice, with the former having a 7.6% higher value ( $P=0.0017$ ). Because intercepts were different between normal and mini phenotypes, but RMR was not different, postural cost was also significantly higher in mini-muscle than in normal mice ( $P=0.0187$ ).

Table 1. Wheel running on days 5 and 6 of the routine test

| Trait                             | N  | Least squares means $\pm$ s.e.m. |                  |                  |
|-----------------------------------|----|----------------------------------|------------------|------------------|
|                                   |    | Mini-muscle (line 3)             | Normal (line 7)  | Normal (line 8)  |
| Mean distance (m)                 | 30 | 15,526 $\pm$ 960                 | 17,856 $\pm$ 960 | 13,921 $\pm$ 960 |
| Mean time (min)                   | 30 | 473.3 $\pm$ 33.0                 | 639.7 $\pm$ 33.0 | 588.6 $\pm$ 33.0 |
| Mean speed (m min <sup>-1</sup> ) | 30 | 32.49 $\pm$ 1.49                 | 28.57 $\pm$ 1.49 | 23.84 $\pm$ 1.49 |
| Max speed (m min <sup>-1</sup> )  | 30 | 49.39 $\pm$ 2.47                 | 48.66 $\pm$ 2.47 | 39.93 $\pm$ 2.47 |

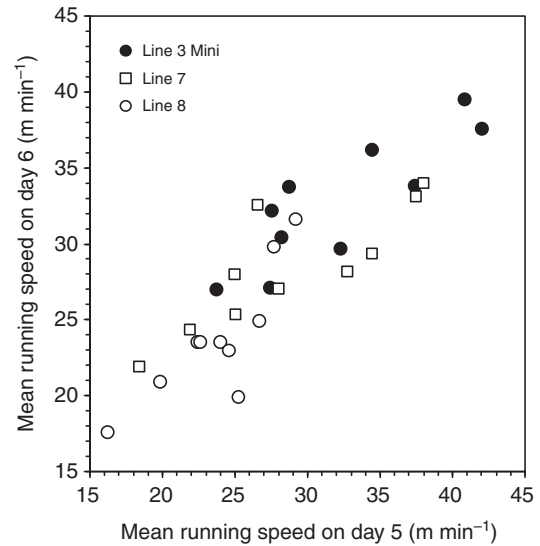

Fig. 3. Mean running speed on days 5 and 6 of the routine 6-day wheel exposure as used to pick breeders in the selection experiment. Mini-muscle mice ran significantly faster than mice with normal muscles (see Table 1).

### Sprint performance

No mice were excluded from sprint speed analyses because of low behavioural scores. In the pooled sample of 30 mice, maximum 1-m sprint speed was significantly repeatable between day 1 and 2, as indicated by a Pearson product-moment correlation ( $r=0.787$  for log-transformed values;  $P<0.0001$ ). On average, mice ran faster on day 2 (two-tailed  $P=0.0173$  for log-transformed values). Using the higher of the two daily values for each mouse (no transformation necessary), maximum sprint speed averaged 23.5% higher in normal than in mini-muscle mice (one-tailed  $P=0.0481$ ; Table 3).

### DISCUSSION

Cursoriality in mammalian runners is often associated with specific morphological features, including relatively long limbs, high metatarsal/femur ratios, and more proximal musculature (Garland and Janis, 1993; Studel and Beattie, 1993; Carrano, 1999), which in turn are correlated with increased locomotor abilities (Garland and Janis, 1993) and more extensive movement in nature (Kelly et al., 2006). Limb morphology is also thought to have a substantial influence on COT in mammalian runners (Hildebrand, 1962; Myers and Studel, 1985), based on the assumption that the work performed to cycle the limbs during a stride constitutes a substantial part of the total COT (Martin, 1985; Claremont and Hall, 1988). Therefore, a smaller and/or more proximally distributed limb mass would require less energy to cycle and hence should lower the iCOT. In support of this idea, Myers and Studel (Myers and Studel, 1985) found that artificial alterations in human limb mass that alter kinetic energy of the limb can result in significant changes in COT. Yet Taylor et al. (Taylor et al., 1974) suggest no difference in COT or iCOT in a comparison of cheetahs, goats and gazelles that were similar in size but differed markedly in limb morphology, although statistical analysis was not performed on the results. Phylogenetic non-independence may also confound interpretation of these and other tests of 'cursorial morphology' (e.g. see Garland and Janis, 1993; Autumn et al., 1999; Barbosa and Moreno, 1999; Kelly et al., 2006).

Here, we used an experimental evolution approach (Garland and Rose, 2009) and studied mice selectively bred for high voluntary

Table 2. Wheel-running during metabolic measurements

| Trait                                      | N  | Least squares means $\pm$ s.e.m. |                  |                  | Mini vs normal |
|--------------------------------------------|----|----------------------------------|------------------|------------------|----------------|
|                                            |    | Mini-muscle (line 3)             | Normal (line 7)  | Normal (line 8)  |                |
| Distance run (m)                           | 30 | 7,967 $\pm$ 912                  | 6,688 $\pm$ 912  | 7,566 $\pm$ 912  | 0.4590         |
| Run time (min)                             | 30 | 301.8 $\pm$ 34.4                 | 286.4 $\pm$ 34.4 | 352.7 $\pm$ 34.4 | 0.6758         |
| $V_{\max}$ (m min <sup>-1</sup> ; 1.5 s)   | 30 | 52.69 $\pm$ 1.92                 | 46.22 $\pm$ 1.92 | 41.65 $\pm$ 1.92 | 0.0009         |
| $V_{\max 1}$ (m min <sup>-1</sup> ; 1 min) | 30 | 46.63 $\pm$ 1.99                 | 40.56 $\pm$ 1.99 | 34.76 $\pm$ 1.99 | 0.0010         |

wheel running to examine how limb morphology may affect sprinting performance and costs of transport during voluntary wheel running. In particular, we tested the performance and cost impact of the mini-muscle phenotype that has increased in frequency in two of the selected lines and has become fixed in one of these lines. The reduced hindlimb mass and longer, thinner hindlimb bones of mini-muscle mice give them a more 'cursorial' morphology than normal mice (Kelly et al., 2006), and this phenotype has been favoured by selection for high voluntary wheel running (Garland et al., 2002). We hypothesized that voluntary running costs would be lower in mini-muscle mice *versus* normal mice, due to the reduction in hindlimb mass in mini-muscle animals. This prediction seems reasonable, although the expected effect of their longer hindlimbs (Kelly et al., 2006) is not entirely clear (e.g. see Steudel-Numbers et al., 2007), and we do not know their effective hindlimb length (Pontzer, 2007) while running on wheels. Additionally, because of a smaller hindlimb muscle mass and altered contractile properties (Syme et al., 2005), we expected a reduction in maximum contractile force and hence slower sprint speed in mini-muscle mice.

The mini-muscle mice in our study ran at higher mean voluntary speeds than normal mice, which is consistent with previous results that mini-muscle mice run faster on wheels and sometimes run more revolutions per day than normal mice (Garland et al., 2002; Syme et al., 2005; Kelly et al., 2006; Hannon et al., 2008; Gomes et al., 2009). However, contrary to our predictions, one of the two main components of transport costs, iCOT – the slope of the speed *versus* metabolic rate relationship (Fig. 2) – was not significantly different between mini-muscle and normal mice. The other major component of running costs is the so-called 'postural cost' (Taylor et al., 1970; Taylor et al., 1982): the elevation of the zero-speed intercept above resting metabolism. An unexpected result was that mini-muscle mice have a higher intercept than normal mice, which contributes to a

higher postural cost in mini-muscle mice. The combination of similar iCOT and higher postural costs means that running costs at any speed are higher in mini-muscle mice than in normal mice.

In large part our prediction of reduced COT in mini-muscle mice was based on the assumption that lighter limbs would be less costly to cycle during running. Previous studies have shown that the cost of leg cycling significantly contributes to running costs (Martin, 1985; Claremont and Hall, 1988). In some circumstances, the cost of leg cycling may be more substantial than the cost of supporting body mass during locomotion. Moreover, there is a greater increase in metabolic rate when an animal is carrying a given load on the feet rather than more proximally on the leg (Martin, 1985), which also suggests the thinner, lighter limbs of mini-muscle mice should provide an energetic savings during running. However, reduced limb muscle mass leads to increased muscle stress and increased costs associated with supporting the body during locomotion (Reilly et al., 2007).

Stride frequency may also be important in determining COT. In smaller animals, higher stride frequencies are often associated with higher costs (Heglund and Taylor, 1988). Because stride frequency is in part a function of limb dimension, it is reasonable to assume that limb morphology could have a significant impact on locomotor performance, including both sprint speed (e.g. Bonine and Garland, 1999) and COT. More proximal muscle distributions may lead to higher stride frequencies and, therefore, higher cost of muscular work per unit time as a result of more rapid leg cycling (Heglund and Taylor, 1988; Raichlen, 2006). However, as speed = stride frequency  $\times$  stride length, energy costs per unit distance covered should be the same or lower for cycling a thin 'cursorial' leg than for 'normal' limb configurations, unless the cursorial limb has reduced stride length. At present we do not have kinematic data for voluntary running in mini-muscle *versus* normal mice. If limb cycling is in part a resonant property of limb structure (Ahlborn et

Table 3. Body mass (mean), cost of transport and maximal sprint speed

| Trait                                                                              | N  | Least squares means $\pm$ s.e.m. |                     |                     | Body mass | Mini (line 3) vs normal (lines 7 and 8) |
|------------------------------------------------------------------------------------|----|----------------------------------|---------------------|---------------------|-----------|-----------------------------------------|
|                                                                                    |    | Mini-muscle (line 3)             | Normal (line 7)     | Normal (line 8)     |           |                                         |
| Body mass (g)                                                                      | 30 | 29.75 $\pm$ 0.80                 | 30.33 $\pm$ 0.80    | 30.96 $\pm$ 0.80    | –         | 0.3679                                  |
| Maximum voluntary O <sub>2</sub> over 1 min (ml O <sub>2</sub> min <sup>-1</sup> ) | 30 | 4.565 $\pm$ 0.200                | 3.967 $\pm$ 0.198   | 4.018 $\pm$ 0.201   | 0.0369    | 0.0284                                  |
| Respiratory exchange ratio at maximum voluntary O <sub>2</sub> over 1 min          | 30 | 0.980 $\pm$ 0.039                | 1.083 $\pm$ 0.037   | 1.011 $\pm$ 0.037   | 0.2461    | 0.1690                                  |
| Daily energy expenditure O <sub>2</sub> (ml O <sub>2</sub> min <sup>-1</sup> )     | 30 | 1.896 $\pm$ 0.061                | 1.743 $\pm$ 0.061   | 1.730 $\pm$ 0.061   | 0.0045    | 0.0442                                  |
| Resting metabolic rate over 10 min (ml O <sub>2</sub> min <sup>-1</sup> )          | 29 | 0.760 $\pm$ 0.027                | 0.730 $\pm$ 0.251   | 0.727 $\pm$ 0.253   | 0.0003    | 0.3347                                  |
| Respiratory exchange ratio at RMR over 10 min                                      | 29 | 0.892 $\pm$ 0.023                | 0.890 $\pm$ 0.021   | 0.909 $\pm$ 0.0225  | 0.0027    | 0.7759                                  |
| iCOT (ml O <sub>2</sub> m <sup>-1</sup> )                                          | 30 | 0.0339 $\pm$ 0.0022              | 0.0336 $\pm$ 0.0022 | 0.0365 $\pm$ 0.0022 | 0.1511    | 0.6839                                  |
| Intercept (ml O <sub>2</sub> min <sup>-1</sup> )                                   | 30 | 2.452 $\pm$ 0.044                | 2.272 $\pm$ 0.043   | 2.258 $\pm$ 0.044   | 0.3169    | 0.0017                                  |
| Postural cost (ml O <sub>2</sub> min <sup>-1</sup> )                               | 29 | 1.674 $\pm$ 0.045                | 1.544 $\pm$ 0.043   | 1.531 $\pm$ 0.043   | 0.2974    | 0.0187                                  |
| Ecological cost of transport (% DEE)                                               | 30 | 0.1003 $\pm$ 0.0101              | 0.0870 $\pm$ 0.0100 | 0.1022 $\pm$ 0.0101 | 0.0326    | 0.6505                                  |
| Absolute cost of transport (ml O <sub>2</sub> day <sup>-1</sup> )                  | 29 | 823.9 $\pm$ 79.3                 | 667.2 $\pm$ 75.0    | 801.3 $\pm$ 75.5    | 0.1909    | 0.3575                                  |
| Maximum sprint speed (m s <sup>-1</sup> )                                          | 30 | 0.9226 $\pm$ 0.1332              | 1.3450 $\pm$ 0.1318 | 1.0663 $\pm$ 0.1333 | 0.3010*   | 0.0481*                                 |

\*One-tailed *t*-test.

al., 2006), then lighter limbs might cycle faster, with reduced stride length. That could be part of the explanation for the higher running costs we observed in the mini-muscle animals.

Another potential complication is that the effects of body size on locomotor costs may differ for walking *vs* running (Rubenson et al., 2007). Changes in COT at different gaits have been reported in at least one rodent (Kenagy and Hoyt, 1989). If the mini-muscle mice had different gait *versus* speed preferences than normal mice, perhaps because of different limb muscle characteristics, then their running costs might differ. However, we saw no inflection point in the speed *versus* metabolic rate relationship that might indicate cost variation due to gait changes (Fig. 2).

Speculatively, one possible explanation for the apparent selective advantage of the mini-muscle allele stems from the higher voluntary running speeds of mini-muscle mice (Table 1) (see also Syme et al., 2005; Kelly et al., 2006; Gomes et al., 2009). At any given speed, the mini-muscle phenotype provides no energy savings over the normal limb phenotype, but because absolute COT (including both iCOT and postural costs) decreases with increasing running speed (Taylor et al., 1970), the economy of running may be improved in faster-running mini-muscle individuals. We did not find a significant difference in overall running economy in this small sample of animals (Table 3), but a savings at high speeds might be apparent with a larger sample size.

It is also possible that the mini-muscle phenotype has another benefit that would have been difficult to discern through our measurements, such as reduced energy use by the slower and smaller mini muscles and thus reduced reliance on anaerobic metabolism during exercise (Barclay and Weber, 2004) (see also Gomes et al., 2009). Although measurements of work and oxygen consumption in individual muscles revealed that the mini muscles are not more efficient than their normal counterparts, the mini-muscle phenotype may allow mice to run faster without significant accumulation of anaerobic by-products associated with muscle fatigue which may decrease motivation to run (McGillivray et al., 2009). The significantly faster voluntary running speeds of mini-muscle mice (Tables 1 and 2) lend support to this hypothesis. By this means, an improvement of some aspects of running performance could be achieved within particular muscles, even if that improvement is not reflected in whole-animal running energetics.

From a broader perspective, it is important to keep in mind that limbs may be optimized for more than speed or running economy [e.g. manoeuvrability or grasping strength, both of which may be relevant to wheel running: see video (<http://www.biology.ucr.edu/people/faculty/Garland/Girard01.mov>) that accompanies Girard et al. (Girard et al., 2001)]. Also, from the perspective of the evolution of mini-muscle in our experiment, the selection protocol emphasizes distance run with unlimited access to food, so there may be little selection for the energy savings associated with reduced COT.

Our second main prediction was that mini-muscle mice would have reduced sprinting performance, i.e. lower maximal sprint speeds. Maximum running speed is largely a function of the ability of muscles to generate force, so higher muscle power output *via* differences in muscle volume, architecture or type of contractile fibres should lead to greater sprint speeds (Kumagai et al., 2000; Abe et al., 2001). Strong selection for sprinting ability would be expected to be associated with changes in muscle that enhance power output for a short, fast burst of anaerobic power, such as increased muscle mass and the proportion of fast-twitch fibres. Conversely, a smaller muscle mass with slower muscle fibres, as in the mini-muscle phenotype (Syme et al., 2005; Guderley et al., 2006; Guderley et al., 2008; Bilodeau et al., 2009;

McGillivray et al., 2009), would lead to reduced power output (Syme et al., 2005) and hence impaired sprinting ability. As expected, we found that mini-muscle mice had significantly reduced maximal sprint speeds (Table 3). This may be an unavoidable trade-off between endurance capacity and high-power output, as predicted by Syme et al. (Syme et al., 2005). In voluntary wheel running, all of the mice from these lines typically run at speeds within their aerobic performance capacity, and much more slowly than maximal sprint speed (Rezende et al., 2005; Rezende et al., 2009). Therefore, such traits as muscle fatigue-resistance, endurance capacity, and reduced costs of transport may be favoured by the selection protocol even at the expense of sprint performance.

Supported by NSF grant IOB-0543429 to T.G. and NSERC Discovery grant to D.A.S.

## REFERENCES

- Abe, T., Fukashiro, S., Harada, Y. and Kawamoto, K. (2001). Relationship between sprint performance and muscle fascicle length in female sprinter. *J. Physiol. Anthropol.* **20**, 141-147.
- Ahlborn, B. K., Blake, R. W. and Megill, W. M. (2006). Frequency tuning in animal locomotion. *Zoology* **109**, 43-53.
- Autumn, K., Jindrich, D., DeNardo, D. and Mueller, R. (1999). Locomotor performance at low temperature and the evolution of nocturnality in geckos. *Evolution* **53**, 580-599.
- Barbosa, A. and Moreno, E. (1999). Hindlimb morphology and locomotor performance in waders: an evolutionary approach. *Biol. J. Linn. Soc.* **67**, 313-330.
- Barclay, C. J. and Weber, C. L. (2004). Slow skeletal muscles of the mouse have greater initial efficiency than fast muscles but the same net efficiency. *J. Physiol.* **559**, 519-533.
- Bartholomew, G. A., Vleck, D. and Vleck, C. M. (1981). Instantaneous measurements of oxygen consumption during pre-flight warm-up and postflight cooling in sphingid and saturnid moths. *J. Exp. Biol.* **90**, 17-32.
- Bennett, A. F. (1985). Energetics of locomotion. In *Functional Vertebrate Morphology* (ed. D. M. Bramble, K. F. Liem and D. B. Wake), pp. 173-184. Cambridge, MA: Harvard University Press.
- Bilodeau, G. M., Guderley, H., Joannisse, D. R. and Garland, T., Jr (2009). Reduction of type IIb myosin and IIB fibers in tibialis anterior muscle of mini-muscle mice from high-activity lines. *J. Exp. Zool. A Ecol. Genet. Physiol.* **311A**, 189-198.
- Bonine, K. E. and Garland, T., Jr (1999). Sprint performance of phrynosomatid lizards, measured on a high-speed treadmill, correlates with hindlimb length. *J. Zool. Lond.* **248**, 255-265.
- Carrano, M. T. (1999). What, if anything, is a cursor? Categories *versus* continua for determining locomotor habit in mammals and dinosaurs. *J. Zool. Lond.* **247**, 29-42.
- Chappell, M. A., Garland, T., Jr, Rezende, E. L. and Gomes, F. R. (2004). Voluntary running in deer mice: speed, distance, energy costs and temperature effects. *J. Exp. Biol.* **207**, 3839-3854.
- Claremont, A. D. and Hall, S. J. (1988). Effects of extremity loading upon energy expenditure and running mechanics. *Med. Sci. Sport. Exerc.* **20**, 167-171.
- Djardjan, M. and Garland, T., Jr (1988). Maximal running speeds of bipedal and quadrupedal rodents. *J. Mammal.* **69**, 765-772.
- Dohm, M. R., Richardson, C. S. and Garland, T., Jr (1994). Exercise physiology of wild and random-bred laboratory house mice and their reciprocal hybrids. *Am. J. Physiol.* **267**, R1098-R1108.
- Dohm, M. R., Hayes, J. P. and Garland, T., Jr (1996). Quantitative genetics of sprint running speed and swimming endurance in laboratory house mice (*Mus domesticus*). *Evolution* **50**, 1688-1701.
- Fedak, M. A., Heglund, N. C. and Taylor, C. R. (1982). Energetics and mechanics of terrestrial locomotion. II. Kinetic energy changes of the limbs and body as a function of speed and body size in birds and mammals. *J. Exp. Biol.* **79**, 23-40.
- Friedman, W. A., Garland, T., Jr and Dohm, M. R. (1992). Individual variation in locomotor behavior and maximal oxygen consumption in mice. *Physiol. Behav.* **52**, 97-104.
- Garland, T., Jr (1983). Scaling the ecological cost of transport to body mass in terrestrial mammals. *Am. Nat.* **121**, 571-587.
- Garland, T., Jr and Freeman, P. W. (2005). Selective breeding for high endurance running increases hindlimb symmetry. *Evolution* **59**, 1851-1854.
- Garland, T., Jr and Janis, C. M. (1993). Does metatarsal/femur ratio predict maximal running speed in cursorial mammals? *J. Zool. Lond.* **229**, 133-151.
- Garland, T., Jr and Rose, M. R. (2009). *Experimental Evolution: Concepts, Methods and Applications of Selection Experiments*. Berkeley, CA: University of California Press (in press).
- Garland, T., Jr, Geiser, F. and Baudinette, R. V. (1988). Comparative locomotor performance of marsupial and placental mammals. *J. Zool. Lond.* **215**, 505-522.
- Garland, T., Jr, Gleeson, T. T., Aronovitz, B. A., Richardson, C. S. and Dohm, M. R. (1995). Maximal sprint speeds and muscle fiber composition of wild and laboratory house mice. *Physiol. Behav.* **58**, 869-876.
- Garland, T., Jr, Morgan, M. T., Swallow, J. G., Rhodes, J. S., Girard, I., Belter, J. G. and Carter, P. A. (2002). Evolution of a small-muscle polymorphism in lines of house mice selected for high activity levels. *Evolution* **56**, 1267-1275.
- Girard, I., McAleer, M. W., Rhodes, J. S. and Garland, T., Jr (2001). Selection for high voluntary wheel-running increases speed and intermittency in house mice (*Mus domesticus*). *J. Exp. Biol.* **204**, 4311-4320.

- Gomes, F. R., Rezende, E. L., Malisch, J. L., Lee, S. K., Rivas, D. A., Kelly, S. A., Lytle, C., Yaspelkis, B. B., 3rd and Garland, T., Jr (2009). Glycogen storage and muscle glucose transporters (GLUT-4) of mice selectively bred for high voluntary wheel running. *J. Exp. Biol.* **212**, 238-248.
- Guderley, H., Houle-Leroy, P., Diffie, G. M., Camp, D. M. and Garland, T., Jr (2006). Morphometry, ultrastructure, myosin isoforms, and metabolic capacities of the 'mini-muscles' favoured by selection for high activity in house mice. *Comp. Biochem. Physiol. B* **144**, 271-282.
- Guderley, H., Joanisse, D. R., Mokas, S., Bilodeau, G. M. and Garland, T., Jr (2008). Altered fibre types in gastrocnemius muscles of high wheel-running selected mice with mini-muscle phenotypes. *Comp. Biochem. Physiol. B* **149**, 490-500.
- Hannon, R. M., Kelly, S. A., Middleton, K. A., Kolb, E. M., Pomp, D. and Garland, T., Jr (2008). Phenotypic effects of the 'mini-muscle' allele in a large HR x C57BL/6J mouse backcross. *J. Hered.* **99**, 349-354.
- Hartmann, J., Garland, T., Jr, Hannon, R. M., Kelly, S. A., Muñoz, G. and Pomp, D. (2008). Fine mapping of "mini-muscle", a recessive mutation causing reduced hindlimb muscle mass in mice. *J. Hered.* **99**, 679-687.
- Heglund, N. C. and Taylor, C. R. (1988). Speed, stride frequency and energy cost per stride: how do they change with body size and gait? *J. Exp. Biol.* **138**, 301-318.
- Heglund, N. C. M. A., Fedak Taylor, C. R. and Cavagna, G. A. (1982). Energetics and mechanics of terrestrial locomotion. IV. Total mechanical energy changes as a function of speed and body size in birds and mammals. *J. Exp. Biol.* **79**, 57-66.
- Hildebrand, M. (1962). Walking, running and jumping. *Am. Zool.* **2**, 151-155.
- Houle-Leroy, P., Guderley, H., Swallow, J. G. and Garland, T., Jr (2003). Artificial selection for high activity favors mighty mini-muscles in house mice. *Am. J. Physiol.* **284**, R433-R443.
- John-Alder, H. B., Garland, T., Jr and Bennett, A. F. (1986). Locomotory capacities, oxygen consumption, and the cost of locomotion of the Shingle-back lizard (*Trachydosaurus rugosus*). *Physiol. Zool.* **59**, 523-531.
- Kelly, S. A., Czech, P. P., Wight, J. T., Blank, K. M. and Garland, T., Jr (2006). Experimental evolution and phenotypic plasticity of hindlimb bones in high-activity house mice. *J. Morphol.* **267**, 360-374.
- Kenagy, G. J. and Hoyt, D. F. (1988). Energy cost of walking and running gaits and their aerobic limits in golden-mantled ground squirrels. *Physiol. Zool.* **61**, 34-40.
- Koteja, P., Swallow, J. G., Carter, P. A. and Garland, T., Jr (1999). Energy cost of wheel running in house mice: implications for coadaptation of locomotion and energy budgets. *Physiol. Biochem. Zool.* **72**, 238-249.
- Kumagai, K., Abe, T., Brechue, W. F., Ryushi, T., Takano, S. and Mizuno, M. (2000). Sprint performance is related to muscle fascicle length in male 100-m sprinter. *J. Appl. Physiol.* **88**, 811-816.
- Martin, P. E. (1985). Mechanical and physiological responses to lower extremity loading during running. *Med. Sci. Sport. Exerc.* **17**, 427-433.
- McGillivray, D. G., Garland, T., Jr, Dlugosz, E. M., Chappell, M. A. and Syme, D. A. (2009). Changes in efficiency and myosin expression in the small-muscle phenotype of mice selectively bred for high voluntary running activity. *J. Exp. Biol.* **212**, 977-985.
- Middleton, K. M., Kelly, S. A. and Garland, T., Jr (2008). Selective breeding as a tool to probe skeletal response to high voluntary locomotor activity in mice. *Integr. Comp. Biol.* **48**, 394-410.
- Myers, M. J. and Stuedel, K. (1985). Effect of limb mass and its distribution on the energetic cost of running. *J. Exp. Biol.* **115**, 363-373.
- Pontzer, H. (2007). Effective limb length and the scaling of locomotor cost in terrestrial animals. *J. Exp. Biol.* **210**, 1752-1761.
- Raichlen, D. A. (2006). Effects of limb mass distribution on mechanical power outputs during quadrupedalism. *J. Exp. Biol.* **209**, 633-644.
- Reilly, S. M., McElroy, E. J. and Biknevicius, A. R. (2007). Posture, gait and the ecological relevance of locomotor costs and energy-saving mechanisms in tetrapods. *Zoology* **110**, 271-289.
- Rezende, E. L., Chappell, M. A., Gomes, F. R., Malisch, J. L. and Garland, T., Jr (2005). Maximal metabolic rates during voluntary exercise, forced exercise, and cold exposure in house mice selectively bred for high wheel-running. *J. Exp. Biol.* **208**, 2447-2458.
- Rezende, E. L., Gomes, F. R., Malisch, J. L., Chappell, M. A. and Garland, T., Jr (2006a). Maximal oxygen consumption in relation to subordinate traits in lines of house mice selectively bred for high voluntary wheel running. *J. Appl. Physiol.* **101**, 477-485.
- Rezende, E. L., Kelly, S. A., Gomes, F. R., Chappell, M. A. and Garland, T., Jr (2006b). Effects of size, sex, and voluntary running speeds on costs of locomotion in lines of laboratory mice selectively bred for high wheel-running activity. *Physiol. Biochem. Zool.* **79**, 83-99.
- Rezende, E. L., Gomes, F. R., Chappell, M. A. and Garland, T., Jr (2009). Running behaviour and its energy cost in mice selectively bred for high voluntary locomotor activity. *Physiol. Biochem. Zool.* (in press).
- Rhodes, J. S., Koteja, P., Swallow, J. G., Carter, P. A. and Garland, T., Jr (2000). Body temperatures of house mice artificially selected for high voluntary wheel-running behavior: repeatability and effect of genetic selection. *J. Therm. Biol.* **25**, 391-400.
- Rubenson, J., Heliams, D. B., Maloney, S. K., Withers, P. C., Lloyd, D. G. and Fournier, P. A. (2007). Reappraisal of the comparative cost of human locomotion using gait-specific allometric analyses. *J. Exp. Biol.* **210**, 3513-3524.
- Schmidt-Nielsen, K. (1972). Locomotion: energetic cost of swimming, flying and running. *Science* **177**, 222-228.
- Stuedel, K. and Beattie, J. (1993). Scaling of cursoriality in mammals. *J. Morphol.* **217**, 55-63.
- Stuedel-Numbers, K. L., Weaver, T. D. and Wall-Scheffler, C. M. (2007). The evolution of human running: effects of changes in lower-limb length on locomotor economy. *J. Hum. Evol.* **53**, 191-196.
- Swallow, J. G., Garland, T., Jr, Carter, P. A., Zhan, W. Z. and Sieck, G. C. (1998). Effects of voluntary activity and genetic selection on aerobic capacity in house mice (*Mus domesticus*). *J. Appl. Physiol.* **84**, 69-76.
- Swallow, J. G., Koteja, P., Carter, P. A. and Garland, T., Jr (1999). Artificial selection for increased wheel-running activity in house mice results in decreased body mass at maturity. *J. Exp. Biol.* **202**, 2513-2520.
- Swallow, J. G., Hayes, J. P., Koteja, P. and T., Garland, T., Jr (2009). Selection experiments and experimental evolution of performance and physiology. In *Experimental Evolution: Concepts, Methods and Applications of Selection Experiments* (ed. T. Garland, Jr and M. R. Rose), pp. 301-351. Berkeley, MA: University of California Press.
- Syme, D. A., Evanshuk, K., Grintuch, B., Rezende, E. L. and Garland, T., Jr (2005). Contractile abilities of normal and 'mini' triceps surae muscles from mice (*Mus domesticus*) selectively bred for high voluntary wheel running. *J. Appl. Physiol.* **99**, 1308-1316.
- Taylor, C. R., Schmidt-Nielsen, K. and Raab, J. L. (1970). Scaling of energetic cost of running to body size in mammals. *Am. J. Physiol.* **219**, 1104-1107.
- Taylor, C. R., Shkolnik, A., Dmi'el, R., Baharav, D. and Borut, A. (1974). *Am. J. Physiol.* **227**, 848-850.
- Taylor, C. R., Heglund, N. and Maloij, G. M. O. (1982). Energetics and mechanics of terrestrial locomotion. I. Metabolic energy consumption as a function of speed and body size in birds and mammals. *J. Exp. Biol.* **97**, 1-21.
- Wong, L. E., Garland, T., Jr, Rowan, S. L. and Hepple, R. T. (2009). Anatomic capillarization is elevated in the medial gastrocnemius muscle of mighty mini mice. *J. Appl. Physiol.* **106**, 1660-1667.
